# Supplementary material for: How many times should we repeat measurements of the ultrasound-guided attenuation parameter for evaluating hepatic steatosis?
Source: PubMed Central journal article supplement — Ultrasonography. 2022 Oct 31;42(2):227–37. doi: 10.14366/usg.22122 (PMC10071056; doi:10.14366/usg.22122), 2022-10-31
Supplement: usg-22122-Supplementary-Fig-1.pdf [file usg-22122-Supplementary-Fig-1.pdf]

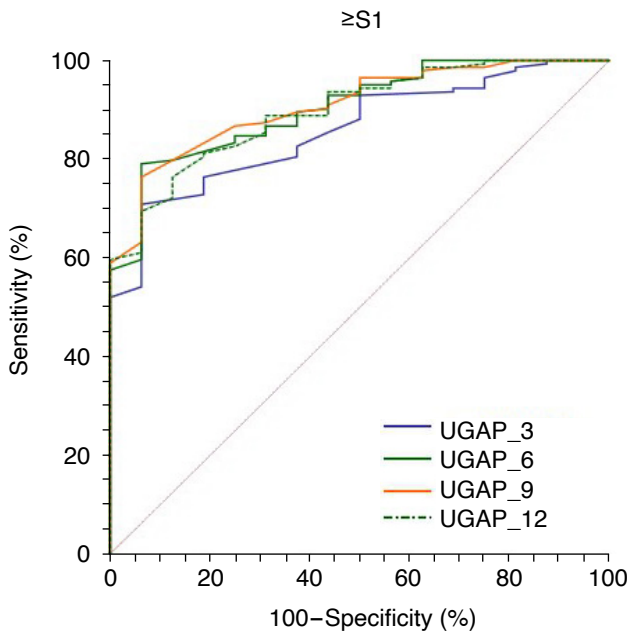

A

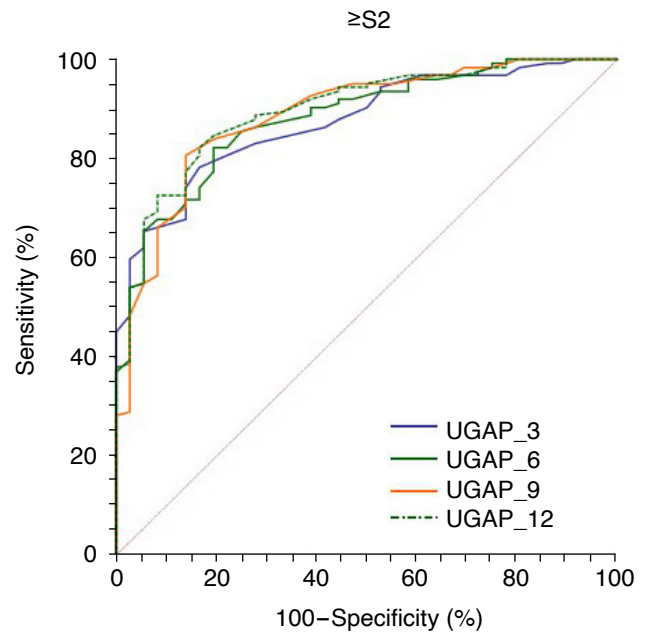

B

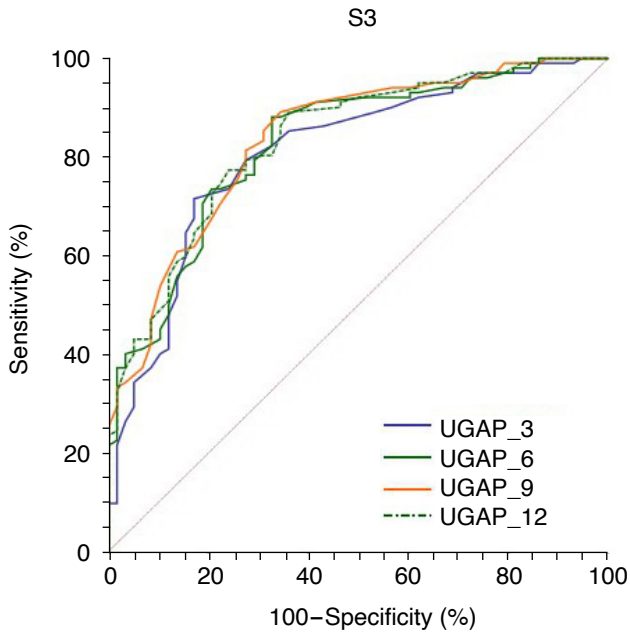

C

**Supplementary Fig. 1.** Comparison of receiver operating characteristic curves among UGAP\_3, UGAP\_6, UGAP\_9, and UGAP\_12 for diagnosing  $\geq S1$  (A),  $\geq S2$  (B), and S3 (C). UGAP, ultrasound-guided attenuation parameter; UGAP\_3, 3-repeated measurements obtaining 3 attenuation coefficients using UGAP; UGAP\_6, 6-repeated measurements obtaining 6 attenuation coefficients using UGAP; UGAP\_9, 9-repeated measurements obtaining 9 attenuation coefficients using UGAP; UGAP\_12, 12-repeated measurements obtaining 12 attenuation coefficients using UGAP.
