# Supplementary material for: How many times should we repeat measurements of the ultrasound-guided attenuation parameter for evaluating hepatic steatosis?
Source: PubMed Central journal article supplement — Ultrasonography. 2022 Oct 31;42(2):227–37. doi: 10.14366/usg.22122 (PMC10071056; doi:10.14366/usg.22122), 2022-10-31
Supplement: usg-22122-Supplementary-Table-1.pdf [file usg-22122-Supplementary-Table-1.pdf]

**Supplementary Table 1.** Comparison of the AC, IQR/median, and CV among UGAP\_3, UGAP\_6, UGAP\_9, and UGAP\_12 according to each hepatic steatosis stage

| Parameter      | UGAP_3      | UGAP_6      | UGAP_9      | UGAP_12     | P-value              |
|----------------|-------------|-------------|-------------|-------------|----------------------|
| AC (dB/cm/MHz) |             |             |             |             |                      |
| Overall        | 0.727±0.009 | 0.731±0.116 | 0.724±0.009 | 0.734±0.113 | 0.398                |
| S0             | 0.600±0.017 | 0.574±0.078 | 0.579±0.020 | 0.582±0.076 | 0.199                |
| S1             | 0.630±0.013 | 0.643±0.068 | 0.642±0.016 | 0.639±0.068 | 0.218                |
| S2             | 0.711±0.020 | 0.706±0.079 | 0.708±0.015 | 0.713±0.072 | 0.710                |
| S3             | 0.770±0.010 | 0.778±0.103 | 0.783±0.010 | 0.780±0.100 | 0.537                |
| IQR/median (%) |             |             |             |             |                      |
| Overall        | 7.2±0.3     | 8.9±0.6     | 9.7±0.3     | 9.8±0.5     | <0.001 <sup>a)</sup> |
| S0             | 11.0±2.0    | 14.2±0.7    | 15.8±1.9    | 17.8±0.9    | 0.111                |
| S1             | 8.8±1.2     | 8.7±0.5     | 9.5±0.8     | 9.6±0.3     | 0.227                |
| S2             | 8.5±0.9     | 10.6±0.7    | 10.9±1.0    | 10.4±0.4    | 0.088                |
| S3             | 6.1±0.2     | 7.8±0.1     | 8.6±0.3     | 7.8±1.0     | <0.001 <sup>a)</sup> |
| CV (%)         |             |             |             |             |                      |
| Overall        | 5.5±0.3     | 7.6±0.3     | 7.8±0.3     | 8.0±0.3     | <0.001 <sup>a)</sup> |
| S0             | 8.3±1.2     | 11.0±1.1    | 11.5±1.1    | 12.2±1.3    | 0.007 <sup>a)</sup>  |
| S1             | 5.5±0.7     | 7.7±0.6     | 8.2±0.7     | 8.6±0.8     | 0.004 <sup>a)</sup>  |
| S2             | 6.4±0.6     | 9.0±1.0     | 8.6±0.9     | 8.9±0.9     | 0.033 <sup>a)</sup>  |
| S3             | 4.8±0.3     | 6.8±0.3     | 7.0±0.3     | 7.1±0.3     | <0.001 <sup>a)</sup> |

A P-value of <0.05 represents statistical significance.

AC, attenuation coefficient; IQR, interquartile range; CV, coefficient of variation; UGAP, ultrasound-guided attenuation parameter; UGAP\_3, 3-repeated measurements obtaining 3 attenuation coefficients using UGAP; UGAP\_6, 6-repeated measurements obtaining 6 attenuation coefficients using UGAP; UGAP\_9, 9-repeated measurements obtaining 9 attenuation coefficients using UGAP; UGAP\_12, 12-repeated measurements obtaining 12 attenuation coefficients using UGAP.

<sup>a)</sup>According to the *post-hoc* analysis using the paired t test with the Bonferroni correction, the IQR/median and CV of UGAP\_3 was significantly lower than those of other repetition protocols (P<0.008, statistical significance), and those were not statistically different among UGAP\_6, UGAP\_9, and UGAP\_12.
