# Supplementary material for: How many times should we repeat measurements of the ultrasound-guided attenuation parameter for evaluating hepatic steatosis?
Source: PubMed Central journal article supplement — Ultrasonography. 2022 Oct 31;42(2):227–37. doi: 10.14366/usg.22122 (PMC10071056; doi:10.14366/usg.22122), 2022-10-31
Supplement: usg-22122-Supplementary-Table-4.pdf [file usg-22122-Supplementary-Table-4.pdf]

**Supplementary Table 2.** Comparison of the AC, IQR/median, and CV between UGAP\_6 and UGAP\_12 according to hepatic fibrosis, BMI, and SCD

| Parameter                          | UGAP_6      | UGAP_12     | P-value |
|------------------------------------|-------------|-------------|---------|
| <b>AC</b>                          |             |             |         |
| <b>Hepatic fibrosis</b>            |             |             |         |
| <F2 (n=108)                        | 0.722±0.120 | 0.724±0.116 | 0.187   |
| ≥F2 (n=52)                         | 0.751±0.107 | 0.752±0.105 | 0.557   |
| <b>BMI</b>                         |             |             |         |
| <25.0 kg/m <sup>2</sup> (n=50)     | 0.655±0.100 | 0.658±0.099 | 0.270   |
| 25.0–30.0 kg/m <sup>2</sup> (n=78) | 0.745±0.104 | 0.758±0.100 | 0.323   |
| >30.0 kg/m <sup>2</sup> (n=27)     | 0.817±0.094 | 0.817±0.087 | 0.898   |
| <b>SCD</b>                         |             |             |         |
| <25 mm (n=114)                     | 0.714±0.115 | 0.716±0.112 | 0.265   |
| ≥25 mm (n=46)                      | 0.772±0.110 | 0.776±0.105 | 0.385   |
| <b>IQR/median (%)</b>              |             |             |         |
| <b>Hepatic fibrosis</b>            |             |             |         |
| <F2 (n=108)                        | 8.9±5.9     | 9.5±4.5     | 0.215   |
| ≥F2 (n=52)                         | 8.9±6.2     | 10.4±6.4    | 0.042   |
| <b>BMI</b>                         |             |             |         |
| <25.0 kg/m <sup>2</sup> (n=50)     | 10.6±6.4    | 11.6±6.8    | 0.243   |
| 25.0–30.0 kg/m <sup>2</sup> (n=78) | 8.9±6.0     | 9.6±4.1     | 0.168   |
| >30.0 kg/m <sup>2</sup> (n=27)     | 5.9±3.5     | 7.4±3.3     | 0.060   |
| <b>SCD</b>                         |             |             |         |
| <25 mm (n=114)                     | 9.0±5.8     | 9.9±5.6     | 0.043   |
| ≥25 mm (n=46)                      | 8.7±6.4     | 9.5±3.8     | 0.320   |
| <b>CV (%)</b>                      |             |             |         |
| <b>Hepatic fibrosis</b>            |             |             |         |
| <F2 (n=108)                        | 7.5±3.6     | 10.7±29.5   | 0.264   |
| ≥F2 (n=52)                         | 11.9±31.1   | 13.7±41.5   | 0.225   |
| <b>BMI</b>                         |             |             |         |
| <25.0 kg/m <sup>2</sup> (n=50)     | 9.0±3.9     | 9.5±4.6     | 0.293   |
| 25.0–30.0 kg/m <sup>2</sup> (n=78) | 7.2±3.7     | 11.5±34.7   | 0.280   |
| >30.0 kg/m <sup>2</sup> (n=27)     | 13.6±43.3   | 16.9±57.8   | 0.245   |
| <b>SCD</b>                         |             |             |         |
| <25 mm (n=114)                     | 7.6±3.7     | 8.1±3.9     | 0.038   |
| ≥25 mm (n=46)                      | 12.3±33.0   | 20.7±62.3   | 0.224   |

AC, attenuation coefficient; IQR, interquartile range; CV, coefficient of variation; UGAP, ultrasound-guided attenuation parameter; UGAP\_6, 6-repeated measurements obtaining 6 attenuation coefficients using UGAP; UGAP\_12, 12-repeated measurements obtaining 12 attenuation coefficients using UGAP; BMI, body mass index; SCD, skin-to-capsule distance.

**Supplementary Table 3.** Pearson correlation coefficients (r) between UGAP and CAP

|                | r     | Confidence interval | P-value |
|----------------|-------|---------------------|---------|
| UGAP_3 and CAP | 0.625 | 0.521–0.711         | <0.001  |
| UGAP_9 and CAP | 0.683 | 0.591–0.758         | <0.001  |

UGAP, ultrasound-guided attenuation parameter; CAP, controlled attenuation parameter; UGAP\_3, 3-repeated measurements obtaining 3 attenuation coefficients using UGAP; UGAP\_9, 9-repeated measurements obtaining 9 attenuation coefficients using UGAP.

**Supplementary Table 4.** Diagnostic performance of UGAP for hepatic steatosis staging

|                                  | S≥1         | S≥2         | S=3         |
|----------------------------------|-------------|-------------|-------------|
| <b>UGAP_3</b>                    |             |             |             |
| AUROC                            | 0.859       | 0.874       | 0.810       |
| 95% CI                           | 0.795–0.909 | 0.813–0.921 | 0.740–0.867 |
| Cutoff value                     | 0.67        | 0.67        | 0.70        |
| Sensitivity (%)                  | 70.8        | 78.2        | 71.6        |
| Specificity (%)                  | 93.8        | 83.3        | 82.8        |
| <b>UGAP_6</b>                    |             |             |             |
| AUROC                            | 0.908       | 0.883       | 0.832       |
| 95% CI                           | 0.852–0.948 | 0.823–0.928 | 0.764–0.886 |
| Cutoff value                     | 0.667       | 0.665       | 0.665       |
| Sensitivity (%)                  | 77.8        | 82.3        | 88.2        |
| Specificity (%)                  | 93.7        | 80.6        | 67.2        |
| <b>UGAP_9</b>                    |             |             |             |
| AUROC                            | 0.908       | 0.887       | 0.837       |
| 95% CI                           | 0.852–0.948 | 0.828–0.932 | 0.770–0.890 |
| Cutoff value                     | 0.66        | 0.67        | 0.66        |
| Sensitivity (%)                  | 76.4        | 80.7        | 89.2        |
| Specificity (%)                  | 93.8        | 86.1        | 65.5        |
| <b>UGAP_12</b>                   |             |             |             |
| AUROC                            | 0.897       | 0.897       | 0.834       |
| 95% CI                           | 0.839–0.940 | 0.839–0.940 | 0.767–0.888 |
| Cutoff value                     | 0.665       | 0.67        | 0.7         |
| Sensitivity (%)                  | 76.4        | 82.3        | 77.5        |
| Specificity (%)                  | 87.5        | 83.3        | 75.9        |
| P-value <sup>a)</sup> (3 vs. 6)  | 0.035       | 0.687       | 0.255       |
| P-value <sup>b)</sup> (3 vs. 9)  | 0.042       | 0.509       | 0.136       |
| P-value <sup>c)</sup> (3 vs. 12) | 0.092       | 0.178       | 0.133       |
| P-value <sup>d)</sup> (6 vs. 9)  | 0.728       | 0.448       | 0.282       |
| P-value <sup>e)</sup> (6 vs. 12) | 0.579       | 0.078       | 0.472       |
| P-value <sup>f)</sup> (9 vs. 12) | 0.321       | 0.248       | 0.726       |

UGAP, ultrasound-guided attenuation parameter; UGAP\_3, 3-repeated measurements obtaining 3 attenuation coefficients using UGAP; AUROC, area under the receiver operating characteristic curve; CI, confidence interval; UGAP\_6, 6-repeated measurements obtaining 6 attenuation coefficients using UGAP; UGAP\_9, 9-repeated measurements obtaining 9 attenuation coefficients using UGAP; UGAP\_12, 12-repeated measurements obtaining 12 attenuation coefficients using UGAP.

<sup>a)</sup>Comparison of AUROC between UGAP\_3 and UGAP\_6. <sup>b)</sup>Comparison of AUROC between UGAP\_3 and UGAP\_9. <sup>c)</sup>Comparison of AUROC between UGAP\_3 and UGAP\_12. <sup>d)</sup>Comparison of AUROC between UGAP\_6 and UGAP\_9. <sup>e)</sup>Comparison of AUROC between UGAP\_6 and UGAP\_12. <sup>f)</sup>Comparison of AUROC between UGAP\_9 and UGAP\_12.
